# Supplementary material for: Dual signaling via interferon and DNA damage response elicits entrapment by giant PML nuclear bodies
Source: eLife journal article supplement (doi:10.7554/elife.73006), 2022-03-23

**Figure 4a**

anti p-STAT2 immunoblot

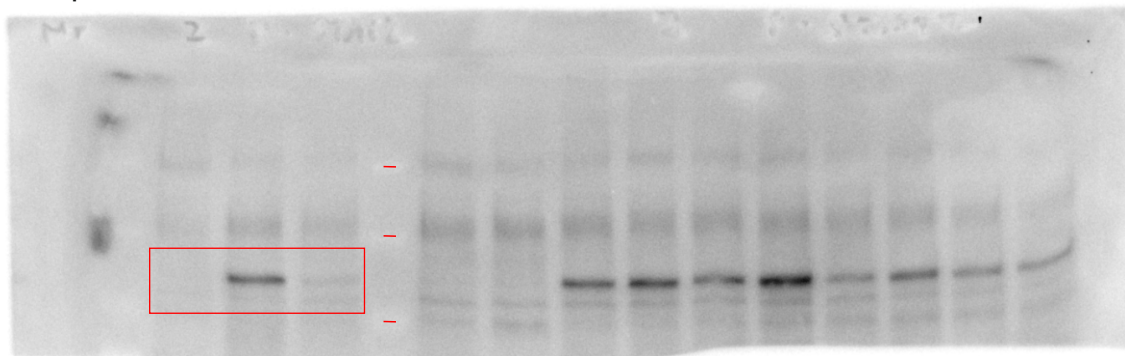

anti PML immunoblot

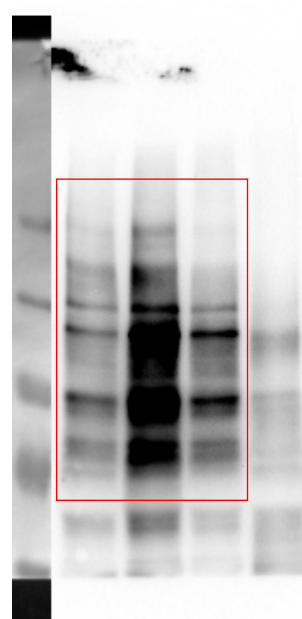

anti UL84 immunoblot

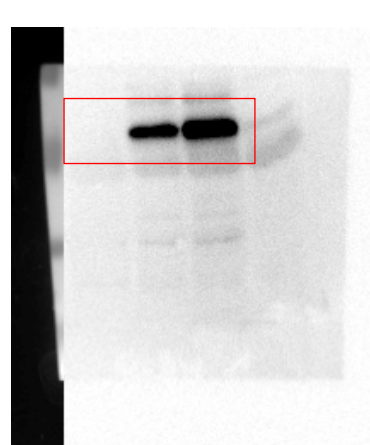

anti MCP immunoblot

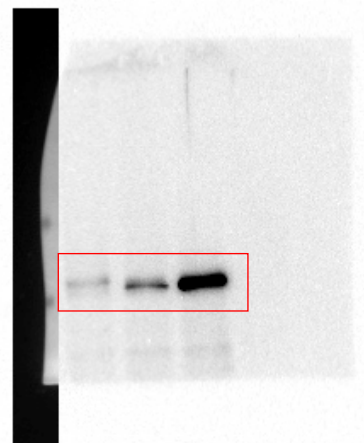

anti Sp100 immunoblot

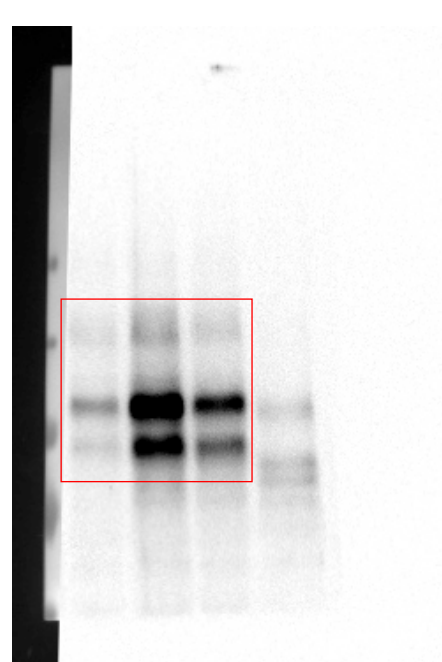

anti  $\beta$ -actin immunoblot

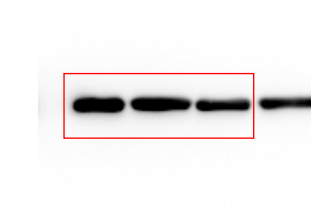

Figure 4d

anti PML immunoblot

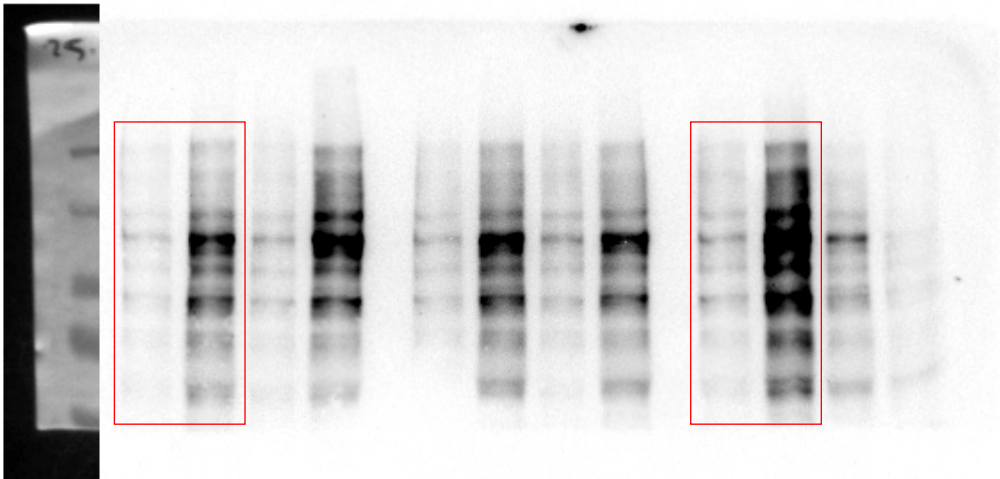

anti Sp100 immunoblot

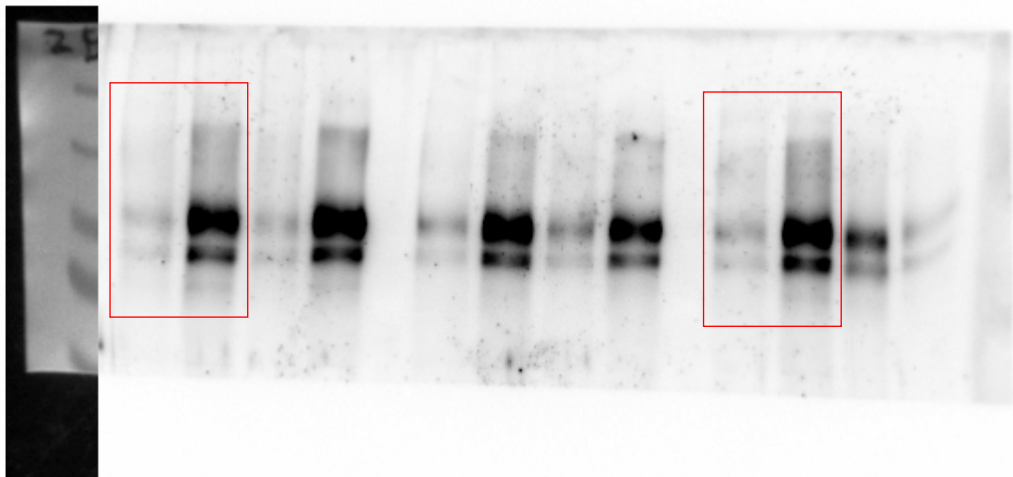

anti  $\beta$ -actin immunoblot

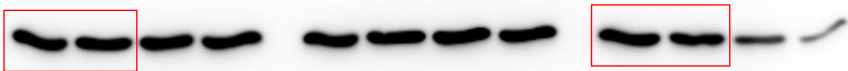

Supplement: fig4-data1 [file Figure 4a and 4d western blots with labeled bands.pdf › Figure 4a and 4d western blots with labeled bands.pdf]
