# Supplementary material for: Dual signaling via interferon and DNA damage response elicits entrapment by giant PML nuclear bodies
Source: eLife. 2022 Mar 23;11:e73006. doi: 10.7554/eLife.73006 (PMC8975554; doi:10.7554/eLife.73006)
Supplement: Figure 1—source data 1. [file elife-73006-fig1-data1.xlsx]

## Sheet: Tabelle1
Figure 1b
	# analyzed cells	# cells with ring-like PML-NBs	# cells with normal PML-NBs	# cells with dispersed PML	% cells with ring-like PML-NBs	mean value	SD	p-value (unpaired, one-tailed t-test; compared to HCMV)
HCMV	333	0	0	333	0	0	0
	314	0	0	314	0
	300	0	0	300	0
HCMVΔIE1	318	307	11	0	0.965409	0.965133	0.00778017	1.40742e-09
	404	393	11	0	0.972772
	187	179	8	0	0.957219
HCMV/IE1-L174P	325	305	20	0	0.938462	0.95807	0.0172279	3.48263e-08
	314	303	11	0	0.964968
	308	299	9	0	0.970779
