# Supplementary material for: Dual signaling via interferon and DNA damage response elicits entrapment by giant PML nuclear bodies
Source: eLife. 2022 Mar 23;11:e73006. doi: 10.7554/eLife.73006 (PMC8975554; doi:10.7554/eLife.73006)
Supplement: Figure 3—source data 1. [file elife-73006-fig3-data1.xlsx]

## Sheet: Figure 3b, 3c
Figure 3b,c
# total PML foci					# PML foci per cell						% PML foci
mock					mock				mean value		mock
all foci	1146	1378	1486		all foci	22.92	22.5902	27.5185	24.3429
foci < 3 µM	1130	1340	1458		foci < 3 µM	22.6	21.9672	27	23.8557		foci < 3 µM	0.979988
foci 3-10 µM	16	38	28		foci 3-10 µM	0.32	0.622951	0.518519	0.487156		foci 3-10 µM	0.0200123
foci > 10 µM	0	0	0		foci > 10 µM	0	0	0	0		foci > 10 µM	0
analyzed cells	50	61	54
MOI 0.1					MOI 0.1				mean value		MOI 0.1
all foci	2973	2403	2479		all foci	59.46	47.1176	47.6731	51.4169
foci < 3 µM	2703	2040	2283		foci < 3 µM	54.06	40	43.9038	45.9879		foci < 3 µM	0.894413
foci 3-10 µM	266	360	193		foci 3-10 µM	5.32	7.05882	3.71154	5.36345		foci 3-10 µM	0.104313
foci > 10 µM	4	3	3		foci > 10 µM	0.08	0.0588235	0.0576923	0.0655053		foci > 10 µM	0.001274
analyzed cells	50	51	52
MOI 0.5					MOI 0.5				mean value		MOI 0.5
all foci	1882	1658	2492		all foci	37.64	30.1455	37.7576	35.181
foci < 3 µM	1547	1246	2005		foci < 3 µM	30.94	22.6545	30.3788	27.9911		foci < 3 µM	0.795631
foci 3-10 µM	318	398	478		foci 3-10 µM	6.36	7.23636	7.24242	6.94626		foci 3-10 µM	0.197444
foci > 10 µM	17	14	9		foci > 10 µM	0.34	0.254545	0.136364	0.243636		foci > 10 µM	0.00692522
analyzed cells	50	55	66
MOI 1					MOI 1				mean value		MOI 1
all foci	1339	1544	1281		all foci	26.78	29.6923	25.1176	27.1967
foci < 3 µM	1017	1128	896		foci < 3 µM	20.34	21.6923	17.5686	19.867		foci < 3 µM	0.730494
foci 3-10 µM	298	396	363		foci 3-10 µM	5.96	7.61538	7.11765	6.89768		foci 3-10 µM	0.253622
foci > 10 µM	24	20	22		foci > 10 µM	0.48	0.384615	0.431373	0.431996		foci > 10 µM	0.0158842
analyzed cells	50	52	51
MOI 5					MOI 5				mean value		MOI 5
all foci	696	868	900		all foci	13.92	14.2295	15	14.3832
foci < 3 µM	452	608	635		foci < 3 µM	9.04	9.96721	10.5833	9.86352		foci < 3 µM	0.685768
foci 3-10 µM	226	234	235		foci 3-10 µM	4.52	3.83607	3.91667	4.09091		foci 3-10 µM	0.284423
foci > 10 µM	18	26	30		foci > 10 µM	0.36	0.42623	0.5	0.428743		foci > 10 µM	0.0298087
analyzed cells	50	61	60
MOI 10					MOI 10				mean value		MOI 10
all foci	501	531	697		all foci	10.02	9	13.6667	10.8956
foci < 3 µM	282	271	428		foci < 3 µM	5.64	4.59322	8.39216	6.20846		foci < 3 µM	0.569816
foci 3-10 µM	196	234	233		foci 3-10 µM	3.92	3.9661	4.56863	4.15158		foci 3-10 µM	0.381034
foci > 10 µM	23	26	36		foci > 10 µM	0.46	0.440678	0.705882	0.53552		foci > 10 µM	0.0491503
analyzed cells	50	59	51
foci 3-10 µM	p-value (unpaired, two-tailed t-test; compared to mock)
MOI 0.1	0.00736447
MOI 0.5	2.9895e-05
MOI 1	0.000210574
MOI 5	0.000102641
MOI 10	8.6223e-05
foci > 10 µM	p-value (unpaired, one-tailed t-test; compaired to mock)
MOI 0.1	0.000416671
MOI 0.5	0.00726572
MOI 1	4.8216e-05
MOI 5	0.000223872
MOI 10	0.00164779

## Sheet: Figure 3f
Figure 3f
# total PML foci					# PML foci per cell						% PML foci
- PFA					- PFA				mean value		- PFA
all foci	1140	1020	1205		all foci	19.322	19.6154	20.0833	19.6736		all foci
foci < 3 µM	735	699	743		foci < 3 µM	12.4576	13.4423	12.3833	12.7611		foci < 3 µM	0.648641
foci 3-10 µM	378	293	431		foci 3-10 µM	6.40678	5.63462	7.18333	6.40824		foci 3-10 µM	0.325728
foci > 10 µM	27	28	31		foci > 10 µM	0.457627	0.538462	0.516667	0.504252		foci > 10 µM	0.0256309
analyzed cells	59	52	60
+ PFA					+ PFA				mean value		+ PFA
all foci	1548	1470	1740		all foci	28.1455	26.7273	34.1176	29.6635		all foci
foci < 3 µM	951	955	1193		foci < 3 µM	17.2909	17.3636	23.3922	19.3489		foci < 3 µM	0.652281
foci 3-10 µM	584	506	532		foci 3-10 µM	10.6182	9.2	10.4314	10.0832		foci 3-10 µM	0.339919
foci > 10 µM	13	9	15		foci > 10 µM	0.236364	0.163636	0.294118	0.231373		foci > 10 µM	0.00779992
analyzed cells	55	55	51
foci > 10 µM	p-value (unpaired, two-tailed t-test)
+ PFA	0.00367719
