# Supplementary material for: Dual signaling via interferon and DNA damage response elicits entrapment by giant PML nuclear bodies
Source: eLife. 2022 Mar 23;11:e73006. doi: 10.7554/eLife.73006 (PMC8975554; doi:10.7554/eLife.73006)
Supplement: Figure 4—source data 2. [file elife-73006-fig4-data2.xlsx]

## Sheet: Figure 4c
Figure 4c
	# total PML foci	# PML foci per cell	% PML foci
mock
all foci	1141	22.82
foci < 3 µM	1108	22.16	0.971078
foci 3-10 µM	33	0.66	0.028922
foci > 10 µM	0	0	0
analyzed cells	50
infected
all foci	986	19.72
foci < 3 µM	628	12.56	0.636917
foci 3-10 µM	315	6.3	0.319473
foci > 10 µM	43	0.86	0.0436105
analyzed cells	50
infected + mAb-IFNAR
all foci	1063	21.26
foci < 3 µM	826	16.52	0.777046
foci 3-10 µM	233	4.66	0.219191
foci > 10 µM	4	0.08	0.00376294
analyzed cells	50

## Sheet: Figure 4f
Figure 4f
# total PML foci					# PML foci per cell						% PML foci
mock					mock				mean value		mock
all foci	1234	1577	1539		all foci	24.68	25.0317	22.3043	24.0054
foci < 3 µM	1218	1559	1526		foci < 3 µM	24.36	24.746	22.1159	23.7407		foci < 3 µM	0.988973
foci 3-10 µM	16	18	13		foci 3-10 µM	0.32	0.285714	0.188406	0.264707		foci 3-10 µM	0.011027
foci > 10 µM	0	0	0		foci > 10 µM	0	0	0	0		foci > 10 µM	0
analyzed cells	50	63	69
IFN 3d					IFN 3d				mean value		IFN 3d
all foci	3294	2847	3215		all foci	65.88	54.75	55.431	58.687
foci < 3 µM	3053	2658	2989		foci < 3 µM	61.06	51.1154	51.5345	54.57		foci < 3 µM	0.929847
foci 3-10 µM	241	189	226		foci 3-10 µM	4.82	3.63462	3.89655	4.11706		foci 3-10 µM	0.0701528
foci > 10 µM	0	0	0		foci > 10 µM	0	0	0	0		foci > 10 µM	0
analyzed cells	50	52	58
IFN 6d					IFN 6d				mean value		IFN 6d
all foci	3554	3388	3502		all foci	71.08	58.4138	61.4386	63.6441
foci < 3 µM	3290	3091	3231		foci < 3 µM	65.8	53.2931	56.6842	58.5924		foci < 3 µM	0.920626
foci 3-10 µM	264	297	271		foci 3-10 µM	5.28	5.12069	4.75439	5.05169		foci 3-10 µM	0.079374
foci > 10 µM	0	0	0		foci > 10 µM	0	0	0	0		foci > 10 µM	0
analyzed cells	50	58	57

## Sheet: Figure 4h
Figure 4h
	# analyzed cells	# Cells with normal PML-NBs	# Cells with PML circles	# Cells with PML caps	# Cells with PML forks	# Cells with PML caps and circles	# Cells with PML forks and circles	# Cells with PML forks and caps	# Cells with PML circles,forks and caps			% Cells with normal PML-NBs	% Cells with PML circles	% Cells with PML caps	% Cells with PML forks	% Cells with PML caps and circles	% Cells with PML forks and circles	% Cells with PML forks and caps	% Cells with PML circles,forks and caps
DMSO	333	329	4	0	0	0	0	0	0		DMSO	0.987988	0.012012	0	0	0	0	0	0
	700	686	14	0	0	0	0	0	0			0.98	0.02	0	0	0	0	0	0
	304	297	7	0	0	0	0	0	0			0.976974	0.0230263	0	0	0	0	0	0
DMSO + IFN	330	312	18	0	0	0	0	0	0		IFN	0.945455	0.0545455	0	0	0	0	0	0
	715	687	28	0	0	0	0	0	0			0.960839	0.0391608	0	0	0	0	0	0
	514	488	24	1	0	0	0	1	0			0.949416	0.0466926	0.00194553	0	0	0	0.00194553	0
CPT 2d	650	569	55	9	13	1	3	0	0		CPT 2d	0.875385	0.0846154	0.0138462	0.02	0.00153846	0.00461538	0	0
	454	411	27	0	7	0	9	0	0			0.905286	0.0594714	0	0.0154185	0	0.0198238	0	0
	519	430	58	16	8	4	3	0	0			0.828516	0.111753	0.0308285	0.0154143	0.00770713	0.00578035	0	0
CPT 2d + IFN	279	78	127	5	20	11	37	1	0		IFN+CPT 2d	0.27957	0.455197	0.0179211	0.0716846	0.0394265	0.132616	0.00358423	0
	744	223	234	37	78	46	113	8	5			0.299731	0.314516	0.0497312	0.104839	0.061828	0.151882	0.0107527	0.00672043
	573	108	252	22	38	38	104	5	6			0.188482	0.439791	0.0383944	0.0663176	0.0663176	0.181501	0.008726	0.0104712
CPT 4d	1046	803	140	27	31	23	18	3	1		CPT 4d	0.767686	0.133843	0.0258126	0.0296367	0.0219885	0.0172084	0.00286807	0.000956023
	365	260	66	14	6	11	6	2	0			0.712329	0.180822	0.0383562	0.0164384	0.030137	0.0164384	0.00547945	0
	437	341	57	16	4	16	2	1	0			0.78032	0.130435	0.0366133	0.00915332	0.0366133	0.00457666	0.00228833	0
CPT 4d + IFN	1043	54	606	37	62	51	222	5	6		IFN+CPT 4d	0.0517737	0.581016	0.0354746	0.0594439	0.0488974	0.212848	0.00479386	0.00575264
	375	12	243	15	19	24	58	1	3			0.032	0.648	0.04	0.0506667	0.064	0.154667	0.00266667	0.008
	446	15	297	13	20	49	50	1	1			0.0336323	0.665919	0.029148	0.044843	0.109865	0.112108	0.00224215	0.00224215
Doxo 2d	722	210	193	102	108	34	53	18	4		Doxo 2d	0.290859	0.267313	0.141274	0.149584	0.0470914	0.0734072	0.0249307	0.00554017
	284	81	72	41	49	9	29	2	1			0.285211	0.253521	0.144366	0.172535	0.0316901	0.102113	0.00704225	0.00352113
	590	125	153	103	97	46	42	18	6			0.211864	0.259322	0.174576	0.164407	0.0779661	0.0711864	0.0305085	0.0101695
IFN+Doxo 2d	546	51	424	13	17	14	26	1	0		IFN+Doxo 2d	0.0934066	0.776557	0.0238095	0.0311355	0.025641	0.047619	0.0018315	0
	489	41	403	8	11	11	13	2	0			0.0838446	0.824131	0.0163599	0.0224949	0.0224949	0.0265849	0.00408998	0
	496	40	363	18	27	15	32	1	0			0.0806452	0.731855	0.0362903	0.0544355	0.0302419	0.0645161	0.00201613	0
												% Cells with normal PML-NBs	% Cells with PML circles	% Cells with PML caps	% Cells with PML forks	% Cells with PML caps and circles	% Cells with PML forks and circles	% Cells with PML forks and caps	% Cells with PML circles,forks and caps
											Mean values
											DMSO	0.981654	0.0183461	0	0	0	0	0	0
											IFN	0.951903	0.0325239	0	0	0	0	0	0
											CPT 2d	0.869729	0.0389109	0	0	0	0	0	0
											CPT 4d	0.753445	0.0467996	0.000648508	0	0	0	0.000648508	0
											IFN+CPT 2d	0.255928	0.0568229	0.00526389	0.00666667	0.000512821	0.00153846	0.000648508	0
											IFN+CPT 4d	0.0391353	0.0635931	0.00526389	0.0118062	0.000512821	0.00814639	0.000648508	0
											Doxo 2d	0.262645	0.08528	0.0148916	0.0169443	0.00308186	0.0100732	0	0
											IFN+Doxo 2d	0.0859654	0.208807	0.0162499	0.0341724	0.0157112	0.0527402	0.00119474	0
Cells with PML circles
	p-value (unpaired, two-tailed t-test; compared to group without IFN)
DMSO	0.00674249
CPT 2d	0.00249996
CPT 4d	9.30294e-05
Doxo 2d	4.32959e-05

## Sheet: Figure 4j
Figure 4j
# analyzed cells	# PML circles		# PML caps		# PML forks			% PML circles		% PML circles+caps+forks
	yH2AX positive	yH2AX negativ	yH2AX positive	yH2AX negativ	yH2AX positive	yH2AX negativ		yH2AX positive	yH2AX negativ	yH2AX positive	yH2AX negativ
51	77	17	3	2	12	5		0.819149	0.180851	0.793103	0.206897
65	103	31	13	3	14	2		0.768657	0.231343	0.783133	0.216867
52	73	16	0	2	7	3		0.820225	0.179775	0.792079	0.207921
							Mean values:	0.802677	0.197323	0.789438	0.210562
							SD	0.0294672	0.0294672	0.005485	0.005485

## Sheet: Figure 4k
Figure 4k
# total PML foci					# PML foci per cell						% PML foci
DMSO					DMSO				mean value		DMSO
all foci	1366	1055	1393		all foci	20.0882	20.2885	20.791	20.3892
foci < 3 µM	885	702	901		foci < 3 µM	13.0147	13.5	13.4478	13.3208		foci < 3 µM	0.653326
foci 3-10 µM	452	336	466		foci 3-10 µM	6.64706	6.46154	6.95522	6.68794		foci 3-10 µM	0.328013
foci > 10 µM	29	17	26		foci > 10 µM	0.426471	0.326923	0.38806	0.380484		foci > 10 µM	0.018661
analyzed cells	68	52	67
ATMi					ATMi				mean value		ATMi
all foci	877	912	884		all foci	15.386	16	17.68	16.3553
foci < 3 µM	571	554	614		foci < 3 µM	10.0175	9.7193	12.28	10.6723		foci < 3 µM	0.652526
foci 3-10 µM	302	352	264		foci 3-10 µM	5.29825	6.17544	5.28	5.58456		foci 3-10 µM	0.341452
foci > 10 µM	4	6	6		foci > 10 µM	0.0701754	0.105263	0.12	0.0984795		foci > 10 µM	0.00602125
analyzed cells	57	57	50
foci > 10 µM
	p-value (unpaired, two-tailed t-test; compared to DMSO)
ATMi	0.000974869

## Sheet: Figure 4l
Figure 4l
# total PML foci					# PML foci per cell						% PML foci
DMSO					DMSO				mean value		DMSO
all foci	2539	1715	1718		all foci	43.0339	30.625	29.6207	34.4265
foci < 3 µM	2027	1384	1239		foci < 3 µM	34.3559	24.7143	21.3621	26.8108		foci < 3	0.778782
foci 3-10 µM	502	323	468		foci 3-10 µM	8.50847	5.76786	8.06897	7.44843		foci 3-10	0.216357
foci > 10 µM	10	8	11		foci > 10 µM	0.169492	0.142857	0.189655	0.167335		foci >10	0.00486063
analyzed cells	59	56	58
ATMi					ATMi				mean value		ATMi
all foci	2044	1711	1873		all foci	28	33.549	36.7255	32.7582
foci < 3 µM	1707	1410	1617		foci < 3 µM	23.3836	27.6471	31.7059	27.5788		foci < 3 µM	0.841892
foci 3-10 µM	337	301	256		foci 3-10 µM	4.61644	5.90196	5.01961	5.17934		foci 3-10 µM	0.158108
foci > 10 µM	0	0	0		foci > 10 µM	0	0	0	0		foci > 10 µM	0
analyzed cells	73	51	51
foci > 10 µM
	p-value (unpaired, one-tailed t-test; compared to DMSO)
ATMi	0.00012362
