# Supplementary material for: Dual signaling via interferon and DNA damage response elicits entrapment by giant PML nuclear bodies
Source: eLife. 2022 Mar 23;11:e73006. doi: 10.7554/eLife.73006 (PMC8975554; doi:10.7554/eLife.73006)
Supplement: Figure 5—figure supplement 2—source data 1. [file elife-73006-fig5-figsupp2-data1.xlsx]

## Sheet: Figure S3a
Supplementary Figure 3a
	viral genomes per µl	viral genomes per ml	MW	STABW
mock	17016200	17016200000	1.71244e+10	7.81683e+08
	17954500	17954500000
	16402400	16402400000
0.1µM EdC	4253830	4253830000	4.26344e+09	3.87519e+08
	4655670	4655670000
	3880810	3880810000
0.1µM EdU	4169150	4169150000	3030070000	1.69412e+09
	3837820	3837820000
	1083240	1083240000
1µM EdC	1834560	1834560000	2055850000	2.0293e+08
	2099760	2099760000
	2233230	2233230000
1µM EdU	1413870	1413870000	1.43746e+09	7.94507e+07
	1526030	1526030000
	1372470	1372470000

## Sheet: Figure S3b
Supplementary Figure 3b
genomes in viral supernatant (genome equivalents / ml virus supernatant)
	meaurement 1	meaurement 2	mean value of measurements	mean value	SD
AD169∆IE1	90868500000	101133000000	96000750000	1.0315e+11	6.20752e+09
	92621600000	121731000000	107176300000
	91506000000	121037000000	106271500000
AD169∆IE1-EdC	45068200000	66711200000	55889700000	5.37202e+10	2.99832e+09
	39891900000	60705700000	50298800000
	45037500000	64906600000	54972050000
genomes in infected cells (genome equivalents / ml virus supernatant)
	meaurement 1	meaurement 2	mean value of measurements	mean value	SD
AD169∆IE1	2.08395e+09	1976320000	2.03013e+09	1.89746e+09	2.80574e+08
	1208456000	1.94185e+09	1.57515e+09
	2.18827e+09	1985920000	2.08709e+09
AD169∆IE1-EdC	8.59661e+08	8.49881e+08	8.54771e+08	951136000	1.35869e+08
	818000000	966200000	892100000
	1.10348e+09	1.10959e+09	1.10654e+09
titer of viral supernatants (immediate-early units / ml virus supernatant)
		mean value	SD
AD169∆IE1	1.12763e+07	1.46366e+07	3.01331e+06
	1.72308e+07
	1.50588e+07
AD169∆IE1-EdC	8.41026e+06	8.66109e+06	217468
	8.79679e+06
	8.77621e+06

## Sheet: Figure S3d
Supplementary Figure 3d
	# cells	# pp150 signals	# vDNA signals	% labeled particles	mean value	SD
EdC	72	191	140	0.732984	0.719535	0.0239422
	73	169	124	0.733728
	76	185	128	0.691892
EdU	51	141	94	0.666667	0.622733	0.0381097
	59	142	85	0.598592
	34	68	41	0.602941
