# Supplementary material for: Dual signaling via interferon and DNA damage response elicits entrapment by giant PML nuclear bodies
Source: eLife. 2022 Mar 23;11:e73006. doi: 10.7554/eLife.73006 (PMC8975554; doi:10.7554/eLife.73006)
Supplement: Figure 5—source data 1. [file elife-73006-fig5-data1.xlsx]

## Sheet: Figure 5a
Figure 5a
	# viral genomes	# entrapped viral genomes	% entrapped viral genomes	mean values	SD	p-value (unpaired, two-tailed t-test; compared to cells with 1 viral genome)
cells with 1 viral genome (59)	23	21	0.913043	0.914947	0.0127796
	28	26	0.928571
	31	28	0.903226
cells with 2-3 viral genomes (73)	56	39	0.696429	0.697711	0.0555056	0.00272143
	70	45	0.642857
	65	49	0.753846
cells with >3 viral genomes (37)	51	31	0.607843	0.579081	0.0419273	0.000186266
	127	76	0.598425
	113	60	0.530973
72 hpi
V2
Zellen	Genome	Kolok PML	Kolok PML
71	219	218	0.995434
V3
Zellen	Genome	Kolok PML	Kolok PML
35	77	77	1

## Sheet: Figure 5d
Figure 5d
	# cells	# IE2-positive cells	% IE2-positive cells	mean values	SD	p-value (unpaired, two-tailed t-test; compared to cells with 1 viral genome)
cells with 1 viral genome	23	2	0.0869565	0.118463	0.0384382
	28	3	0.107143
	31	5	0.16129
cells with 2-3 viral genomes	22	9	0.409091	0.460423	0.0507829	0.000743932
	47	24	0.510638
	26	12	0.461538
cells with >3 viral genomes	5	5	1	0.930392	0.0755793	7.74118e-05
	20	17	0.85
	17	16	0.941176
72 hpi
V2
Zellen	Genome	Kolok PML	Kolok PML
71	219	218	0.995434
V3
Zellen	Genome	Kolok PML	Kolok PML
35	77	77	1

## Sheet: Figure 5f
Figure 5f
# cells	# viral genomes	# entrapped viral genomes	% entrapped viral genomes	mean value
71	219	218	0.995434	0.996195
42	65	65	1
81	146	145	0.993151

## Sheet: Figure 5h
Figure 5h
	# cells	# entrapped viral genomes	# genomes associated with γH2ax	% genomes associated with γH2ax	mean values	SD
8 hpi	73	129	106	0.821705	0.805433	0.0304803
	36	74	61	0.824324
	52	74	57	0.77027
72 hpi	71	218	133	0.610092	0.555795	0.0533484
	42	65	36	0.553846
	81	145	73	0.503448
