# Supplementary material for: Dual signaling via interferon and DNA damage response elicits entrapment by giant PML nuclear bodies
Source: eLife. 2022 Mar 23;11:e73006. doi: 10.7554/eLife.73006 (PMC8975554; doi:10.7554/eLife.73006)
Supplement: Figure 6—source data 1. [file elife-73006-fig6-data1.xlsx]

## Sheet: Figure 6d
Figure 6d
	gB	albumin	gB / Alb	MW	STABW.S	p-value (unpaired, two-tailed t-test; compared to LV-C)
LV-C	3.90024e+06	6053.46	644.298	552.093	134.355
	3.18254e+06	5228.06	608.743
	3.46874e+06	5753.5	602.893
	2.97969e+06	8454.49	352.439
LV-IE1	4.41334e+07	7105.42	6211.24	5868.56	465.756	5.86604e-07
	5.29257e+07	9204.9	5749.73
	3.69543e+07	7026.13	5259.56
	3.65382e+07	5842.63	6253.73
LV-IE1 1-382	2.45853e+07	6947.55	3538.71	3977.04	759.795	0.000113703
	3.20471e+07	6328.12	5064.23
	2.8071e+07	8301.86	3381.29
	2.94973e+07	7517.29	3923.93

## Sheet: Figure 6e
Figure 6e
	# Cells	# UL44-positive cells	% UL44-positive cells	mean values	SD
LV-C	598	19	0.0317726	0.0410628	0.00999793
	639	33	0.0516432
	528	21	0.0397727
LV-IE1	559	271	0.484794	0.439034	0.0485908
	637	283	0.44427
	652	253	0.388037
LV-IE1 1-382	543	162	0.298343	0.346772	0.0429921
	650	235	0.361538
	552	210	0.380435
	# Cells	# IE1-positive cells	% IE1-positive cells	mean values	SD
LV-C		0		0	0
LV-IE1	550	241	0.438182	0.450386	0.0246569
	532	231	0.434211
	518	248	0.478764
LV-IE1 1-382	542	163	0.300738	0.366313	0.0602934
	620	260	0.419355
	520	197	0.378846
