# Supplementary figures and images for: Dual signaling via interferon and DNA damage response elicits entrapment by giant PML nuclear bodies
Source: eLife journal article supplement (doi:10.7554/elife.73006), 2022-03-23

Figure 3 d

anti IE2 immunoblot

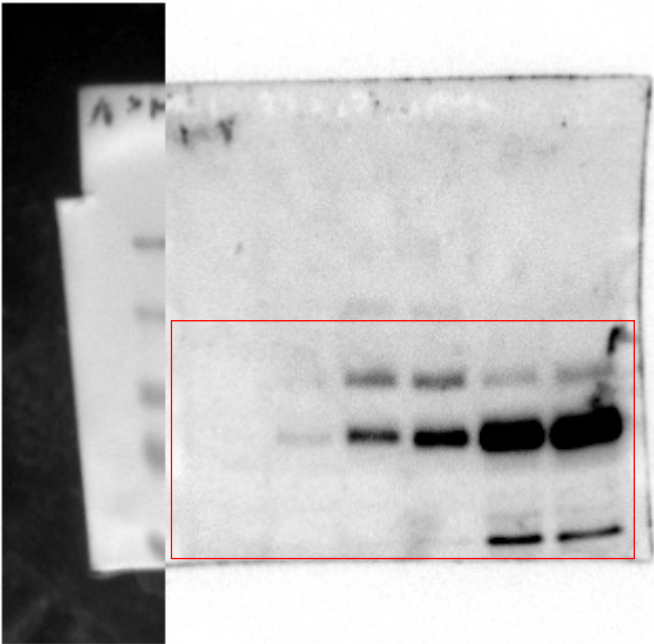

anti UL84 immunoblot

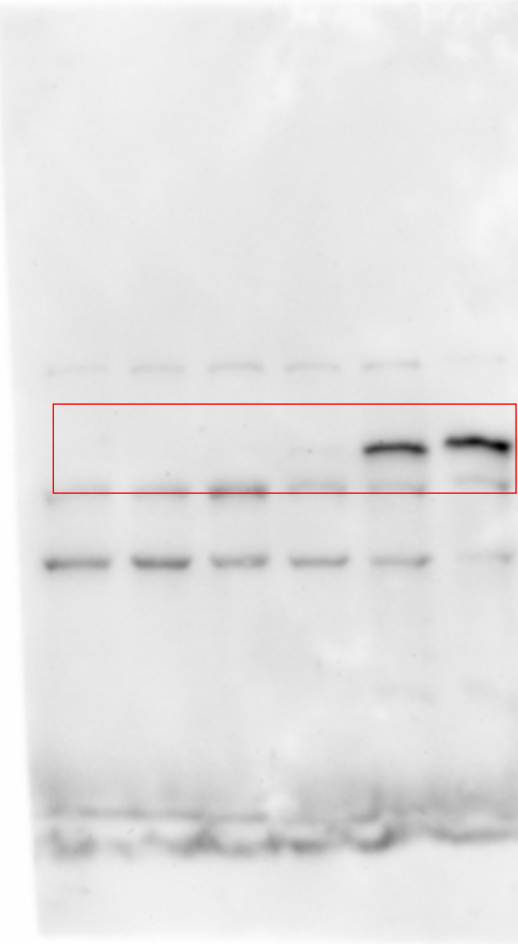

anti UL44 immunoblot

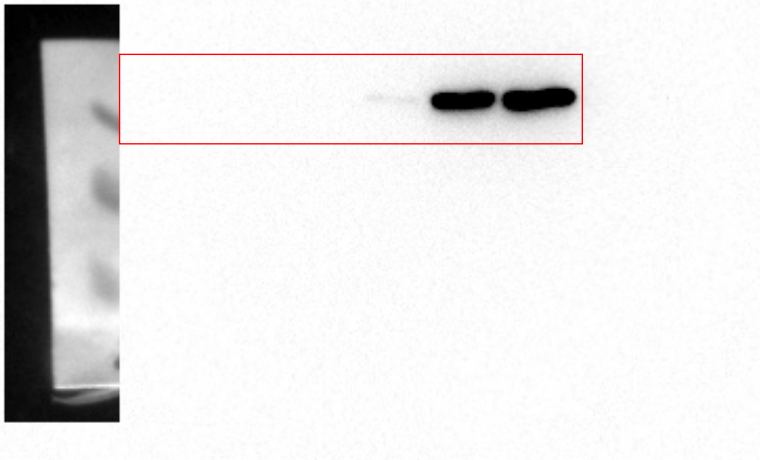

anti  $\beta$ -actin immunoblot

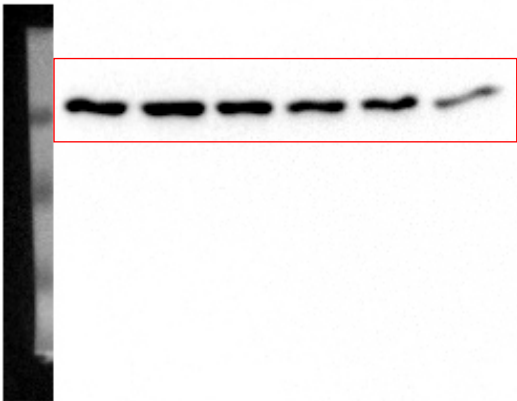

Supplement: fig3-data2 [file Figure 3d-western blots with labeled bands.pdf › Figure 3d-western blots with labeled bands.pdf]
